# Supplementary material
Source: MDPI journal article supplement (https://www.mdpi.com/2304-6740/10/7/94)
Supplement: s1 [file s1]

**Supplementary Material for:**

**Temperature Sensitive Chameleon Luminescent Films Based  
on PMMA Doped with Europium(III) and Terbium(III)  
Anisometric Complexes**

*Yuriy G. Galyametdinov<sup>1,2</sup>, Aleksandr S. Krupin<sup>1</sup>,  
Andrey A. Knyazev<sup>1,\*</sup>*

<sup>1</sup> Department of Physical and Colloid Chemistry, Kazan National Research Technological University, 68 Karl Marx street, 420015 Kazan.

<sup>2</sup>Zavoisky Physical-Technical Institute, FRC Kazan Scientific Center of RAS, 10/7 Sibirsky tract, Kazan 420029, Russia.

Corresponding Author

\*E-mail: knjazev2001@mail.ru

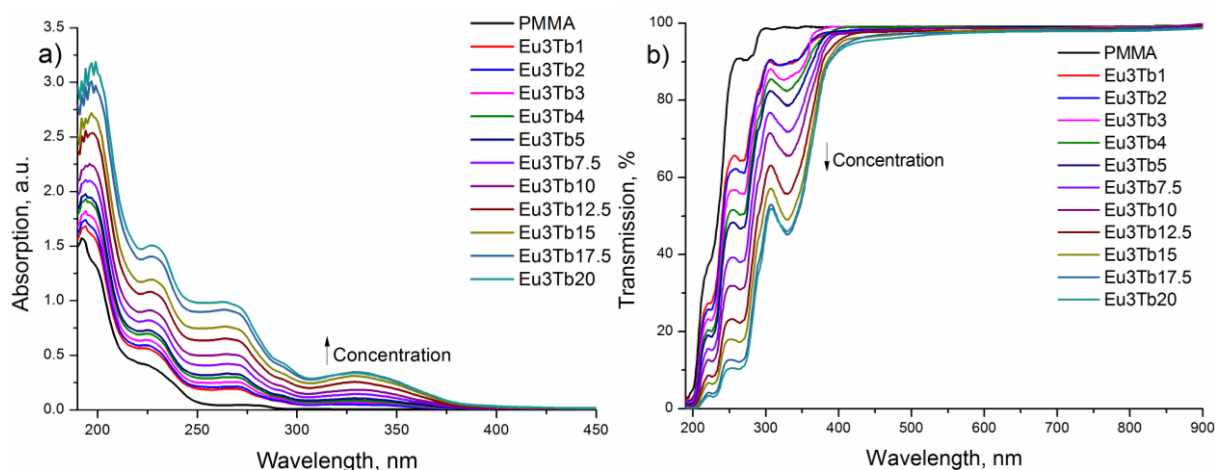

**Figure S1** – The absorption (a) and transmission (b) spectra of the blends based on PMMA and Ln(III) complexes

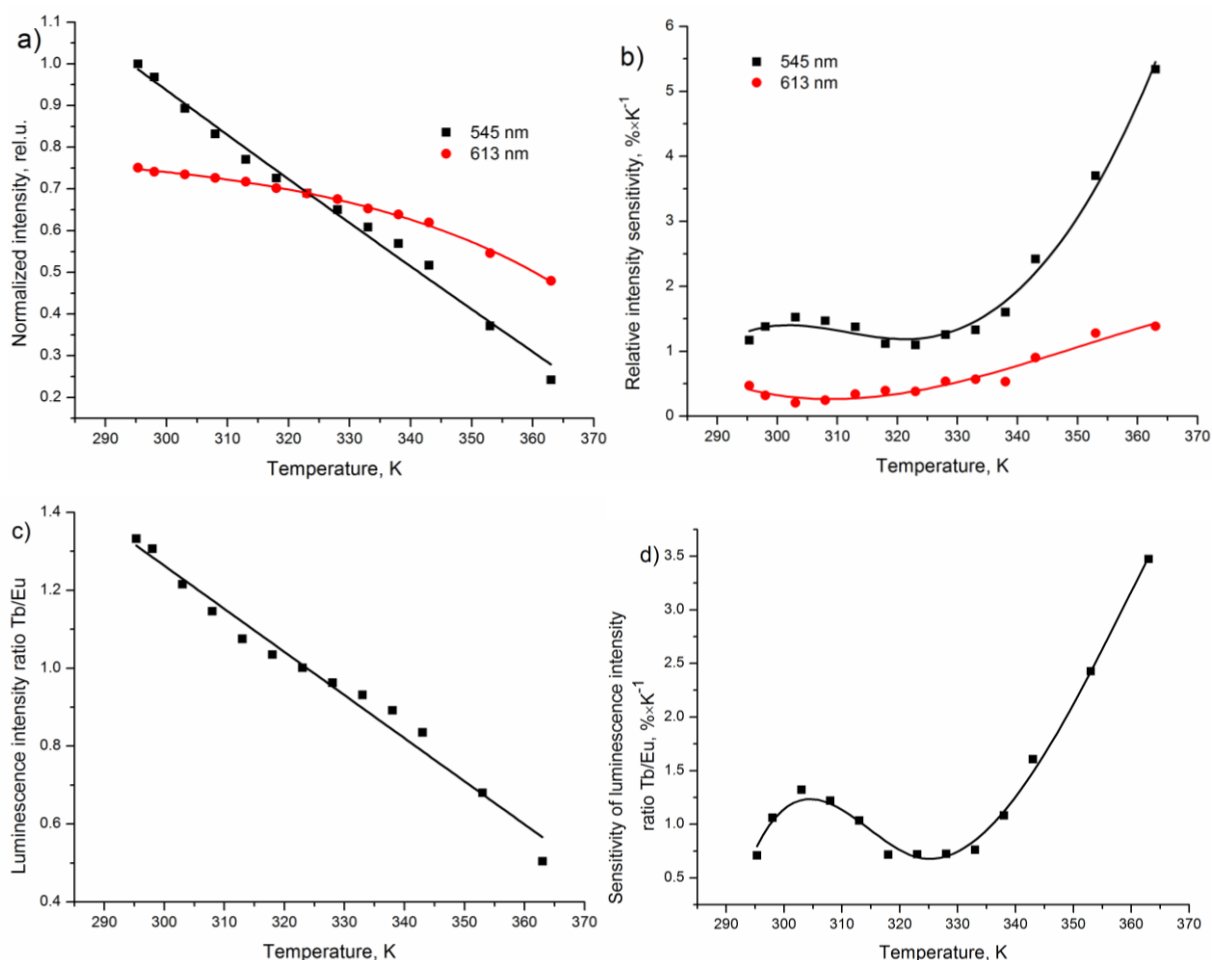

**Figure S2** – Temperature dependences of the normalized luminescence intensity (a), relative sensitivity of intensity (b), the ratio of luminescence intensities of the transitions  $^5D_4 \rightarrow ^7F_5$  (Tb(III), 545 nm) and  $^5D_0 \rightarrow ^7F_2$  (Eu(III), 613 nm) (c), and the sensitivity of the luminescence intensity ratio of the 3%Eu5%Tb composite film (d) at  $\lambda_{ex}=270$  nm

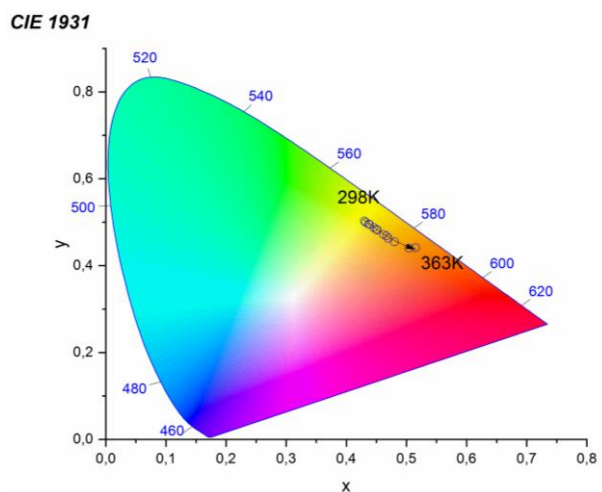

**Figure S3** – CIE luminescence diagram of the PMMA films doped with 3 w.% of the Eu(III) complex and 5 w.% of the Tb(III) complex (3%Eu5%Tb) at various temperatures, the excitation wavelength  $\lambda_{\text{ex}} = 270 \text{ nm}$

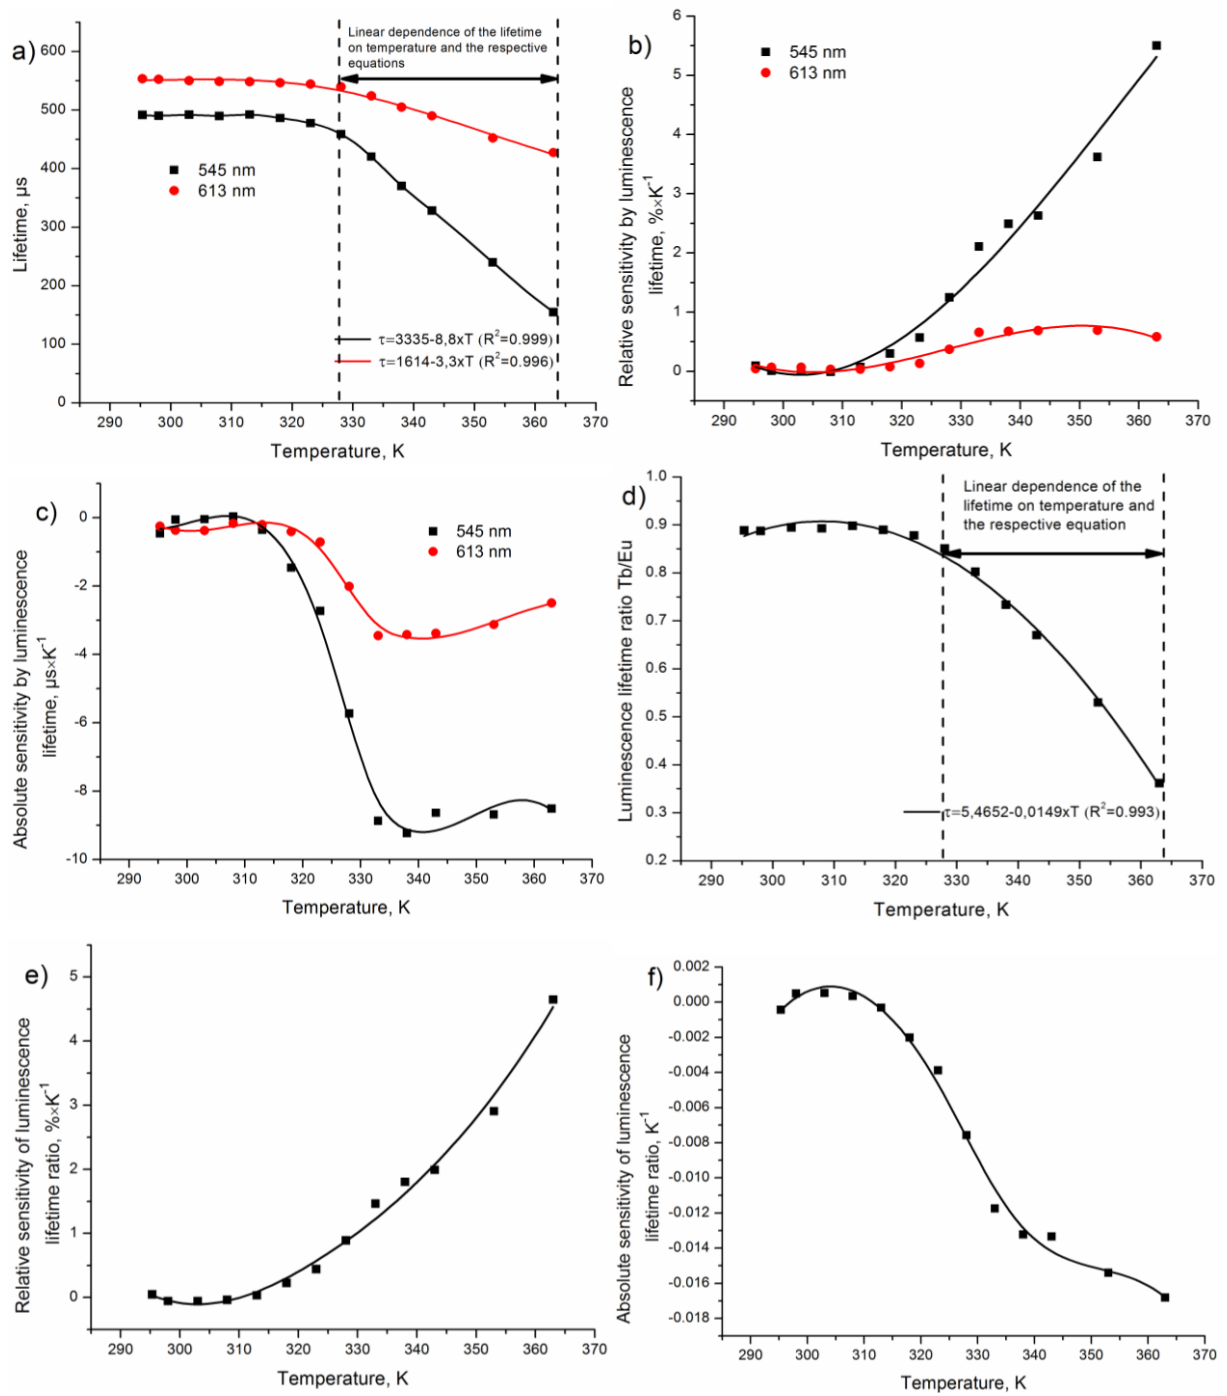

**Figure S4** – Temperature dependences of the luminescence lifetime (a), relative sensitivity of lifetime (b), absolute sensitivity of lifetime (c), the ratio of lifetimes of the  $^5D_4 \rightarrow ^7F_5$  (Tb(III), 545 nm) and  $^5D_0 \rightarrow ^7F_2$  (Eu(III), 613 nm) transitions (d), the relative sensitivity of the lifetime ratio (e), and the absolute sensitivity of the lifetime ratio (f) of the 3%Eu5%Tb composite film at  $\lambda_{ex} = 330$  nm

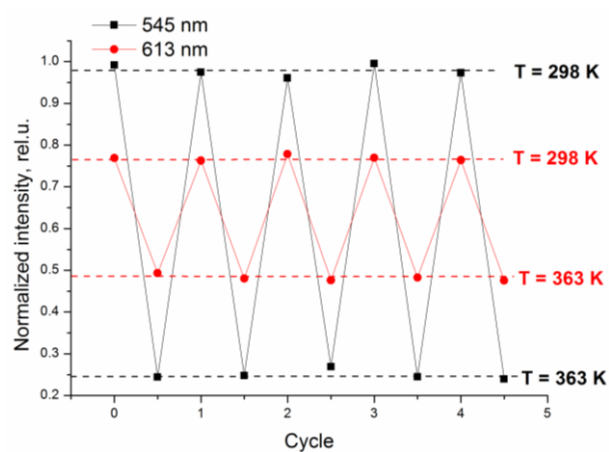

**Figure S5** – Reversible changes in the luminescence intensity of the 3%Eu5%Tb composite film at  $\lambda_{ex}=270$  nm during cycles of heating and cooling between 296 and 363 K

**Table S1** – Quantum efficiency ( $\phi^{Ln}$ ) and relative quantum yield of luminescence ( $\phi$ ) of 3%EuX%Tb at 330 nm excitation wavelength.

| Sample      | $\tau_{obs}$ , $\mu s$ | $A_{rad}$ , $s^{-1}$ | $A_{nrad}$ , $s^{-1}$ | $\phi^{Ln}$ , % | $\eta_{sens}$ , % | $\phi$ , % |
|-------------|------------------------|----------------------|-----------------------|-----------------|-------------------|------------|
| 3%Eu        | 476                    | 617                  | 1484                  | 29.4            | 83.9              | 24.6       |
| 3%Eu1%Tb    | 474                    | 622                  | 1488                  | 29.5            | 83.5              | 24.6       |
| 3%Eu2%Tb    | 475                    | 617                  | 1488                  | 29.3            | 83.8              | 24.5       |
| 3%Eu3%Tb    | 479                    | 606                  | 1481                  | 29.0            | 84.5              | 24.5       |
| 3%Eu4%Tb    | 475                    | 612                  | 1494                  | 29.1            | 87.6              | 25.5       |
| 3%Eu5%Tb    | 480                    | 613                  | 1461                  | 29.9            | 88.2              | 26.3       |
| 3%Eu7.5%Tb  | 494                    | 598                  | 1426                  | 29.5            | 94.8              | 28.0       |
| 3%Eu10%Tb   | 495                    | 613                  | 1407                  | 30.4            | 95.1              | 28.9       |
| 3%Eu12.5%Tb | 503                    | 612                  | 1376                  | 30.8            | 98.7              | 30.4       |
| 3%Eu15%Tb   | 504                    | 622                  | 1363                  | 31.3            | 99.0              | 31.0       |
| 3%Eu17.5%Tb | 508                    | 609                  | 1359                  | 31.0            | 97.6              | 30.2       |
| 3%Eu20%Tb   | 518                    | 576                  | 1354                  | 29.8            | 95.8              | 28.6       |

**Table S2** – Quantum efficiency ( $\phi^{Ln}$ ) and relative quantum yield of luminescence ( $\phi$ ) of 3%EuX%Tb at 270 nm excitation wavelength.

| Sample      | $\tau_{obs}$ , $\mu s$ | $A_{rad}$ , $s^{-1}$ | $A_{nrad}$ , $s^{-1}$ | $\phi^{Ln}$ , % | $\eta_{sens}$ , % | $\phi$ , % |
|-------------|------------------------|----------------------|-----------------------|-----------------|-------------------|------------|
| 3%Eu        | 492                    | 559                  | 1474                  | 27.5            | 91.8              | 25.2       |
| 3%Eu1%Tb    | 511                    | 603                  | 1354                  | 30.8            | 90.4              | 27.8       |
| 3%Eu2%Tb    | 525                    | 628                  | 1276                  | 33.0            | 89.8              | 29.6       |
| 3%Eu3%Tb    | 539                    | 632                  | 1223                  | 34.1            | 89.1              | 30.3       |
| 3%Eu4%Tb    | 547                    | 656                  | 1172                  | 35.9            | 89.3              | 32.0       |
| 3%Eu5%Tb    | 553                    | 663                  | 1146                  | 36.6            | 89.7              | 32.9       |
| 3%Eu7.5%Tb  | 568                    | 646                  | 1115                  | 36.7            | 90.3              | 33.1       |
| 3%Eu10%Tb   | 581                    | 633                  | 1088                  | 36.8            | 90.8              | 33.4       |
| 3%Eu12.5%Tb | 592                    | 623                  | 1066                  | 36.9            | 91.3              | 33.7       |
| 3%Eu15%Tb   | 600                    | 621                  | 1045                  | 37.3            | 91.9              | 34.2       |
| 3%Eu17.5%Tb | 606                    | 571                  | 1079                  | 34.6            | 92.5              | 32.0       |
| 3%Eu20%Tb   | 613                    | 522                  | 1110                  | 32.0            | 92.8              | 29.7       |

**Table S3** – The results of the analysis of synthesized Ln(III) complexes.

| Ln | Yield |    | Elemental |       |        |       |        |       |        |       |        |       | ESI-MS (m/z)               |
|----|-------|----|-----------|-------|--------|-------|--------|-------|--------|-------|--------|-------|----------------------------|
|    |       |    | C, %      |       | H, %   |       | N, %   |       | O, %   |       | Ln, %  |       |                            |
|    | g     | %  | Calcd.    | Found | Calcd. | Found | Calcd. | Found | Calcd. | Found | Calcd. | Found |                            |
| Eu | 0.095 | 70 | 71.60     | 71.11 | 7.99   | 8.25  | 2.04   | 2.00  | 7.22   | 7.38  | 11.05  | 11.20 | 1380 (M + Na) <sup>+</sup> |
| Tb | 0.097 | 71 | 71.12     | 70.64 | 7.95   | 8.31  | 2.03   | 1.98  | 7.24   | 7.44  | 11.31  | 11.65 | 1387 (M + Na) <sup>+</sup> |
